# Supplementary material for: Hierarchically reversible crosslinking polymeric hydrogels with highly efficient self-healing, robust mechanical properties, and double-driven shape memory behavior
Source: Royal Society of Chemistry journal article supplement (doi:10.1039/d0ta10850b), 2021-01-01
Supplement: d0ta10850b8.pdf [file d0ta10850b8.pdf]

## Hierarchically reversible crosslinking polymeric hydrogels with highly efficient self-healing, robust mechanical property, double-driven shape memory behavior

Shishan Xue,<sup>a, e</sup> Yuanpeng Wu,<sup>\*a, b</sup> Guanfei Liu,<sup>a</sup> Meiling Guo,<sup>a</sup> Yuhan Liu,<sup>a</sup> Tao Zhang<sup>\*c</sup> and Zhanhua Wang<sup>\*d</sup>

<sup>a</sup>The Center of Functional Materials for Working Fluids of Oil and Gas Field, School of New Energy and Materials, Southwest Petroleum University, Chengdu 610500, Sichuan, China. E-mail: ypwu@swpu.edu.cn

<sup>b</sup>State Key Laboratory of Oil and Gas Reservoir Geology and Exploitation, Southwest Petroleum University, Chengdu 610500, Sichuan, China.

<sup>c</sup>College of Textile and Clothing Engineering, Soochow University, Suzhou 215123, China. E-mail: zhang.tao@suda.edu.cn

<sup>d</sup>State Key Laboratory of Polymer Materials Engineering, Polymer Research Institute, Sichuan University, Chengdu 610065, China. E-mail: zhwangpoly@scu.edu.cn

<sup>e</sup>School of Chemistry and Chemical Engineering, Mianyang Normal University, Mianyang 62100, China

**Table S1** The parameters of S<sub>x</sub>C<sub>y</sub>-hydrogel

| Name of samples                           | The mass fraction of the P(ATU-co-AM) | Times of freezing-thawing cycles |
|-------------------------------------------|---------------------------------------|----------------------------------|
| S <sub>0</sub> C <sub>0</sub> -hydrogel   | 0                                     | 0                                |
| S <sub>0.5</sub> C <sub>0</sub> -hydrogel | 0.5%                                  | 0                                |
| S <sub>1.0</sub> C <sub>0</sub> -hydrogel | 1.0%                                  | 0                                |
| S <sub>2.0</sub> C <sub>0</sub> -hydrogel | 2.0%                                  | 0                                |
| S <sub>0</sub> C <sub>1</sub> -hydrogel   | 0                                     | 1                                |
| S <sub>0.5</sub> C <sub>1</sub> -hydrogel | 0.5%                                  | 1                                |
| S <sub>1.0</sub> C <sub>1</sub> -hydrogel | 1.0%                                  | 1                                |
| S <sub>2.0</sub> C <sub>1</sub> -hydrogel | 2.0%                                  | 1                                |
| S <sub>0</sub> C <sub>2</sub> -hydrogel   | 0                                     | 2                                |
| S <sub>0.5</sub> C <sub>2</sub> -hydrogel | 0.5%                                  | 2                                |
| S <sub>1.0</sub> C <sub>2</sub> -hydrogel | 1.0%                                  | 2                                |
| S <sub>2.0</sub> C <sub>2</sub> -hydrogel | 2.0%                                  | 2                                |
| S <sub>0</sub> C <sub>3</sub> -hydrogel   | 0                                     | 3                                |
| S <sub>0.5</sub> C <sub>3</sub> -hydrogel | 0.5%                                  | 3                                |
| S <sub>1.0</sub> C <sub>3</sub> -hydrogel | 1.0%                                  | 3                                |
| S <sub>2.0</sub> C <sub>3</sub> -hydrogel | 2.0%                                  | 3                                |

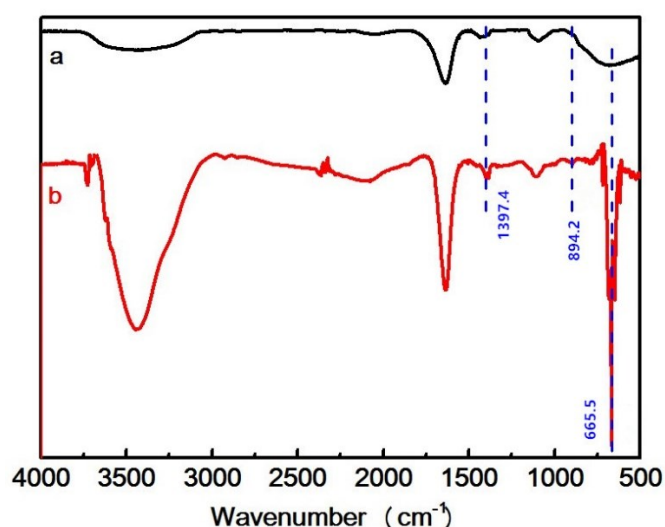

**Fig. S1** FT-IR spectra of PVA-borax hydrogel immersing in (a) acid solution and (b) alkaline solution

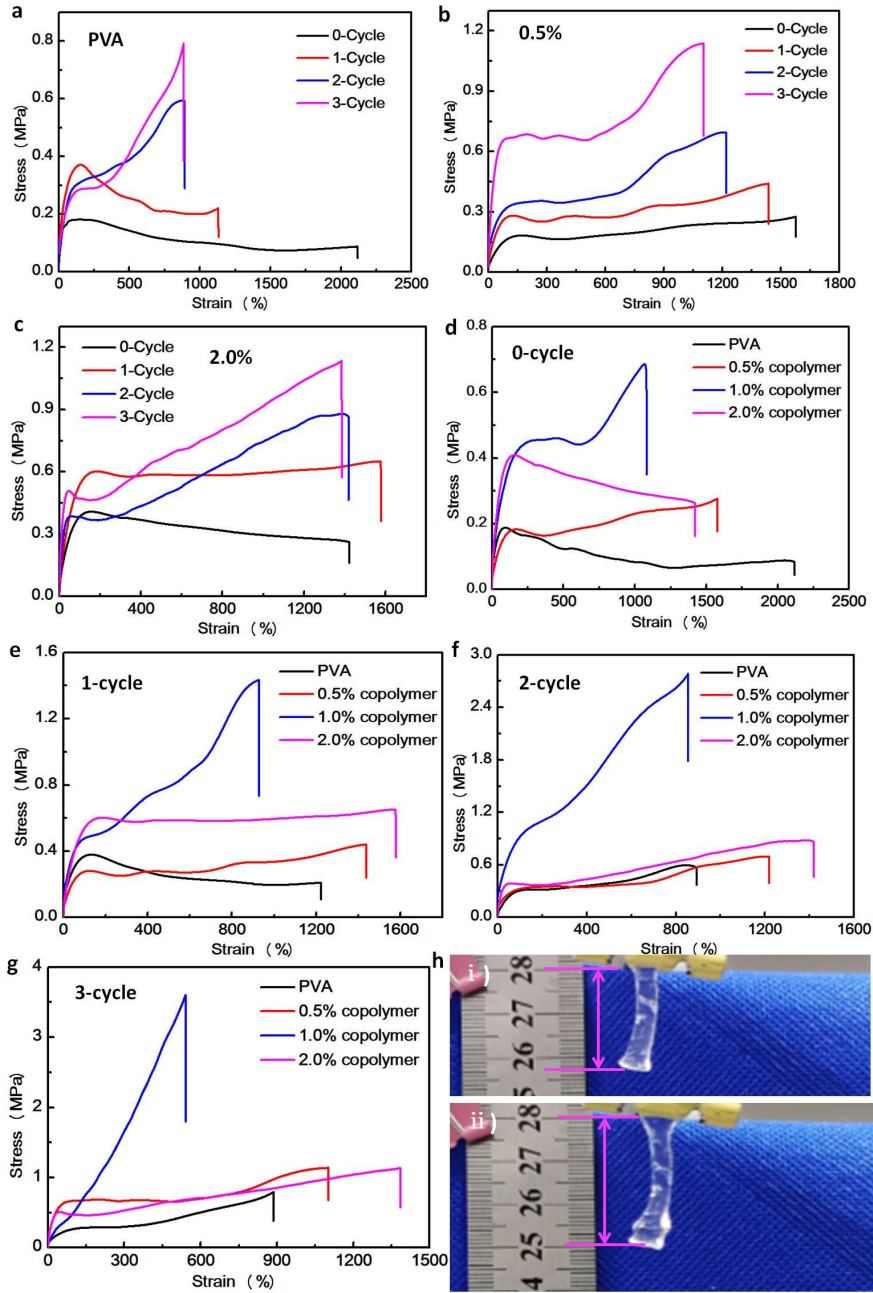

**Fig. S2** Stress-strain curves of (a)  $S_0C_V$ -hydrogel (b)  $S_{0.5}C_V$ -hydrogel and (c)  $S_{2.0}C_V$ -hydrogel subjected to different freezing-thawing cycles and (d)  $S_xC_0$ -hydrogel (e)  $S_xC_1$ -hydrogel (f)  $S_xC_2$ -hydrogel (g)  $S_xC_3$ -hydrogel with different concentration of copolymer (h) the picture of the  $S_{1.0}C_3$ -hydrogel before (i) and (ii) after stretching.

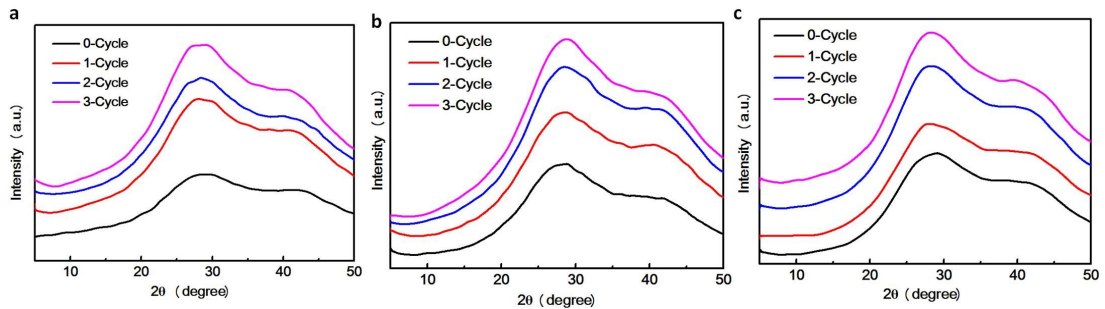

**Fig. S3** X-ray diffraction patterns of (a)  $S_{0.5}C_V$ -hydrogels, (b)  $S_{1.0}C_V$ -hydrogels and (c)  $S_{2.0}C_V$ -hydrogels.

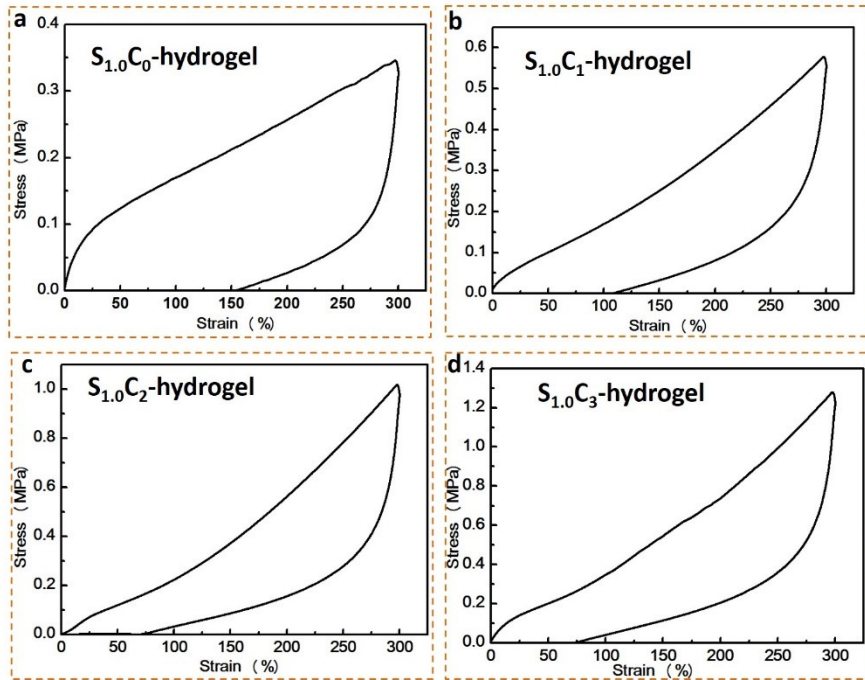

**Fig. S4** Cyclic tensile of loading-unloading curves of (a)  $S_{1.0}C_0$ -hydrogel, (b)  $S_{1.0}C_1$ -hydrogel, (c)  $S_{1.0}C_2$ -hydrogel and (d)  $S_{1.0}C_3$ -hydrogel under the deformation rate of  $50 \text{ mm min}^{-1}$

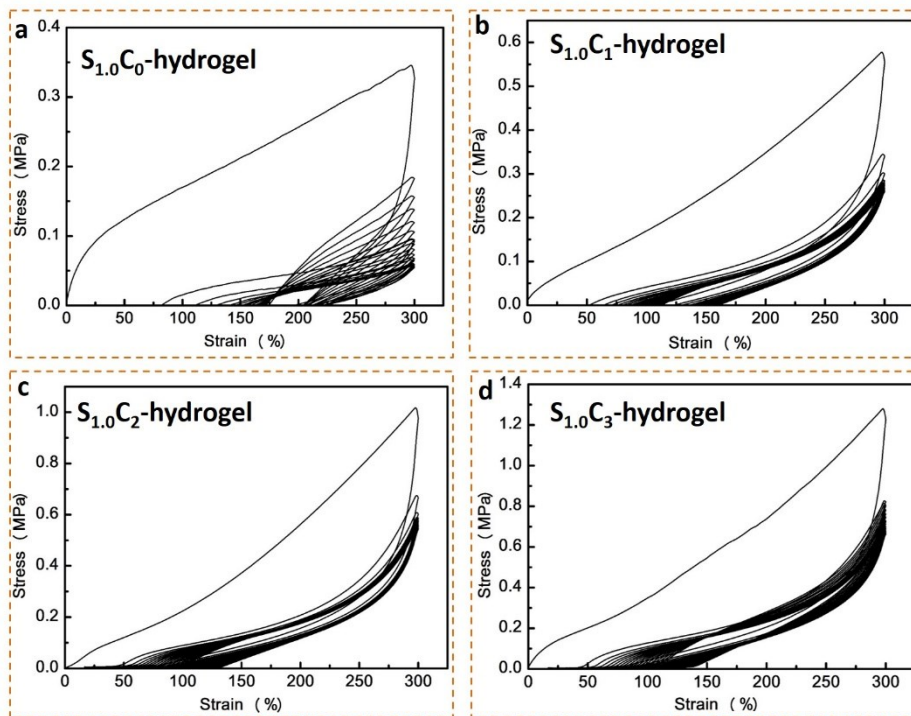

**Fig. S5** Cyclic tensile loading-unloading curves of (a)  $S_{1.0}C_0$ -hydrogel, (b)  $S_{1.0}C_1$ -hydrogel, (c)  $S_{1.0}C_2$ -hydrogel and (d)  $S_{1.0}C_3$ -hydrogel at the strain of 300% for 20 times under the deformation rate of  $50 \text{ mm min}^{-1}$

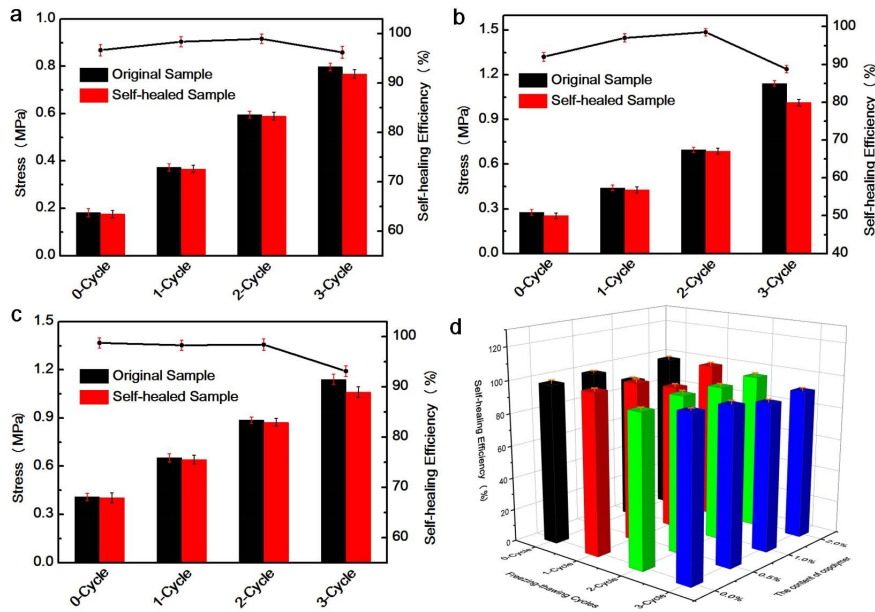

**Fig. S6** (a) The tensile stress (original and self-healed samples) and self-healing efficiency of  $S_0C_\gamma$ -hydrogels; (b) The tensile stress (original and self-healed samples) and self-healing efficiency of  $S_{0.5}C_\gamma$ -hydrogels; (c) The tensile stress (original and self-healed samples) and self-healing efficiency of  $S_{2.0}C_\gamma$ -hydrogels; (d) the self-healing efficiency of the elongation at break of hydrogels with different content of copolymer and different freezing-thawing cycles

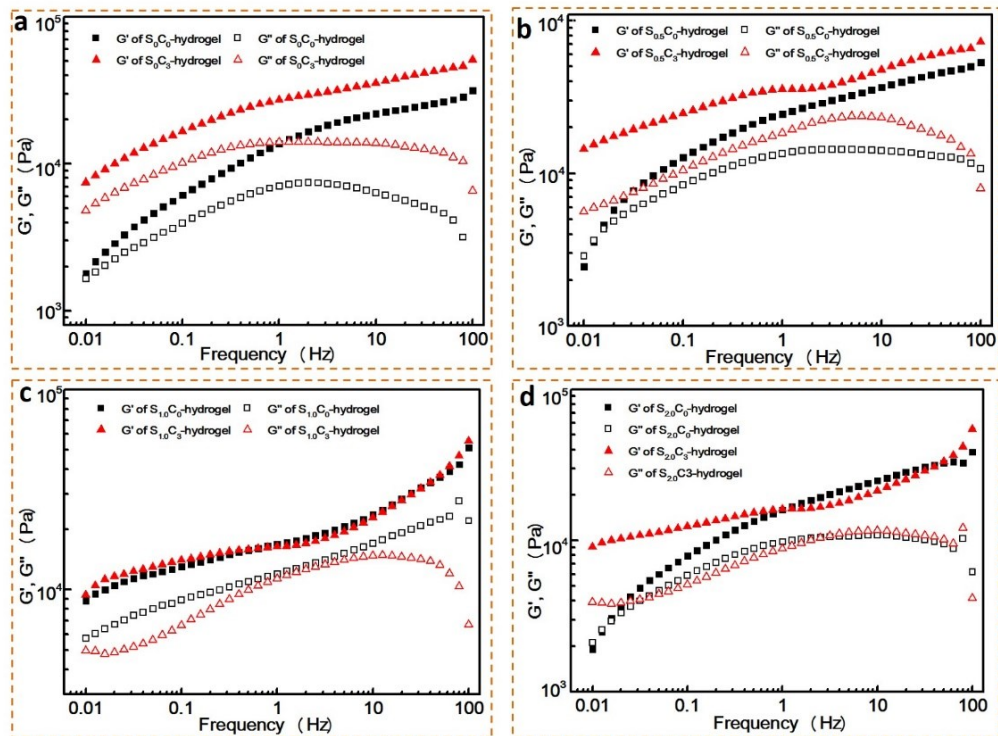

**Fig. S7** Storage modulus ( $G'$ ) and loss modulus ( $G''$ ) of (a)  $S_0C_0$ -hydrogel and  $S_0C_3$ -hydrogel, (b)  $S_{0.5}C_0$ -hydrogel and  $S_{0.5}C_3$ -hydrogel, (c)  $S_{1.0}C_0$ -hydrogel and  $S_{1.0}C_3$ -hydrogel and (d)  $S_{2.0}C_0$ -hydrogel and  $S_{2.0}C_3$ -hydrogel

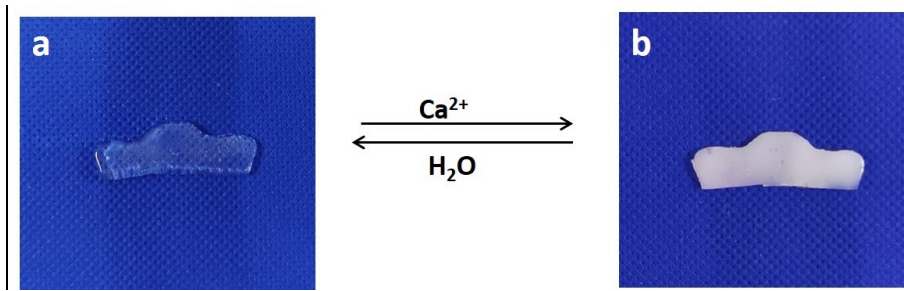

**Fig. S8** The photos of PVA/P(ATU-co-AM) hydrogel with the “cloud” shape exhibited reversible  $\text{Ca}^{2+}$  responsiveness. (a) Before immersing in  $\text{Ca}^{2+}$  solution or after immersing in deionized water; (b) after immersing in  $\text{Ca}^{2+}$  solution.
